1 **Vaccine Effectiveness Against Long COVID in Children: A Report from the RECOVER**  
2 **EHR Cohort**

3  
4 Hanieh Razzaghi, PhD, MPH<sup>1</sup>, Christopher B. Forrest, MD, PhD<sup>1,2</sup>, Kathryn Hirabayashi, MPH<sup>1</sup>,  
5 Qiong Wu, PhD<sup>2</sup>, Andrea Allen, MS<sup>1</sup>, Suchitra Rao, MBBS, MSCS<sup>3</sup>, Yong Chen, PhD<sup>2</sup>, H.  
6 Timothy Bunnell, PhD<sup>18</sup>, Elizabeth A. Chrischilles, PhD<sup>4</sup>, Lindsay G. Cowell, PhD, MS<sup>5</sup>, Mollie  
7 R. Cummins, PhD, RN<sup>6</sup>, David A Hanauer, MD, MS<sup>7</sup>, Miranda Higginbotham, MSHA<sup>1</sup>,  
8 Benjamin D. Horne, PhD, MStat, MPH<sup>8</sup>, Carol R. Horowitz, MD, MPH<sup>16</sup>, Ravi Jhaveri, MD<sup>12</sup>,  
9 Susan Kim, MD, MMSc<sup>13</sup>, Aaron Mishkin, MD<sup>14</sup>, Jennifer A Muszynski, MD, MPH<sup>9</sup>, Susanna  
10 Naggie, MD<sup>10</sup>, Nathan M. Pajor MD, MS<sup>20</sup>, Anuradha Paranjape, MD, MPH<sup>14</sup>, Hayden T  
11 Schwenk, MD, MPH<sup>15</sup>, Marion R. Sills, MD, MPH<sup>3,19</sup>, Yacob G. Tedla, PhD<sup>17</sup>, David A.  
12 Williams, PhD<sup>11</sup>, Charles Bailey MD, PhD<sup>1,2</sup> *on behalf of the RECOVER Consortium\* A*  
13 *complete list of group members appears in the supplementary materials*  
14

15 Affiliations:

16 <sup>1</sup> Applied Clinical Research Center, Children's Hospital of Philadelphia, Philadelphia, PA

17 <sup>2</sup> Department of Pediatrics, Perelman School of Medicine, University of Pennsylvania,  
18 Philadelphia, PA

19 <sup>3</sup> Department of Pediatrics, University of Colorado School of Medicine and Children's Hospital  
20 Colorado, Aurora, CO

21 <sup>4</sup> Department of Epidemiology, College of Public Health, University of Iowa, Iowa City, IA

22 <sup>5</sup> Peter O'Donnell Jr. School of Public Health; Department of Immunology, School of  
23 Biomedical Sciences; UT Southwestern Medical Center; Dallas, TX

24 <sup>6</sup> College of Nursing, University of Utah, Salt Lake City, UT

25 <sup>7</sup> Department of Learning Health Sciences, University of Michigan, Ann Arbor, MI

26 <sup>8</sup> Intermountain Heart Institute, Intermountain Health, Salt Lake City, UT

27 <sup>9</sup> Division of Critical Care Medicine, Department of Pediatrics, Nationwide Children's Hospital,  
28 Columbus, OH

29 <sup>10</sup> Division of Infectious Diseases, Duke University School of Medicine; Duke Clinical Research  
30 Institute, Durham, NC

31 <sup>11</sup> Department of Anesthesiology, University of Michigan, Ann Arbor, MI

32 <sup>12</sup> Division of Infectious Diseases, Ann & Robert H. Lurie Children's Hospital of Chicago,  
33 Chicago, IL

34 <sup>13</sup> University of California, San Francisco, Division of Rheumatology, Benioff Children's  
35 Hospital, San Francisco CA

36 <sup>14</sup> Temple University Lewis Katz School of Medicine, Section of Infectious Diseases,  
37 Philadelphia, PA

38 <sup>15</sup> Stanford School of Medicine, Division of Pediatric Infectious Diseases, Stanford, CA

39 <sup>16</sup> Institute for Health Equity Research, Icahn School of Medicine at Mount Sinai, NYC, NY

40 <sup>17</sup> Division of Epidemiology, Department of Medicine, Vanderbilt University Medical Center,  
41 Nashville, TN

42 <sup>18</sup> Biomedical Research Informatics Center, Nemours Children's Health, Wilmington, DE

43 <sup>19</sup> OCHIN, Inc., Portland, OR

44 <sup>20</sup> Division of Pulmonary Medicine, Cincinnati Children's Hospital Medical Center and  
45 University of Cincinnati College of Medicine, Cincinnati, OH

46 **Address Correspondence to:** Hanieh Razzaghi, Roberts Center for Pediatric Research, Room  
47 11361, 2716 South Street, Philadelphia, PA 19146, [razzaghih@chop.edu], (267) 425-9684

48 **Short Title:** Vaccine Effectiveness Against Pediatric Long COVID

49 **Disclosures:** Dr. Mollie Cummins is employed by Doxy.me Inc., a commercial telemedicine  
50 platform provider. Dr. Benjamin Horne is a member of the advisory boards of OpSis Health and  
51 Lab Me Analytics, and a consultant to Pfizer (regarding clinical risk scores; funds paid to  
52 Intermountain). Dr. Susanna Naggie reports research grants from Gilead Sciences and AbbVie,  
53 scientific advisor/stock options from Vir Biotechnologies, consulting with no financial payment  
54 from Pardes Biosciences and Silverback Therapeutics, DSMB fees from Personal Health  
55 Insights, Inc, event adjudication committee fees from BMS/PRA outside the submitted work. Dr.  
56 Mishkin receives Grant support from Pfizer paid directly to Institution Advisory Board for  
57 Takeda. Dr. Jhaveri is a consultant for AstraZeneca, Seqirus, Dynavax, receives an editorial  
58 stipend from Elsevier and Pediatric Infectious Diseases Society. Dr. Rao reports prior grant  
59 support from GSK and Biofire and is a consultant for Sequiris. The remaining authors have no  
60 disclosures.

61 **Funding/Support:** This research was funded by the National Institutes of Health (NIH)  
62 Agreement OT2HL161847-01 as part of the Researching COVID to Enhance Recovery  
63 (RECOVER) program of research.

64 **Disclaimer:** The views and conclusions contained in this document are those of the authors and  
65 should not be interpreted as representing the official policies, either expressed or implied, of the  
66 NIH.

67 **Abbreviations:** PCR – polymerase chain reaction; EHR – electronic health record; CI – 95%  
68 confidence intervals; ICD-10-CM – International Classification of Diseases, version 10, clinical  
69 modification; PMCA – Pediatric Medical Complexity Algorithm; US – United States of  
70 America; VE – vaccine effectiveness; VIS – vaccine information system.

71 **Article Summary:** Vaccination against COVID-19 has a protective effect against long COVID  
72 in children and adolescents. The effect wanes over time but remains significant at 12 months.

### 73 **What's Known on This Subject**

74 Vaccines reduce the risk and severity of COVID-19 in children. There is evidence for reduced  
75 long COVID risk in adults who are vaccinated, but little information about similar effects for  
76 children and adolescents, who have distinct forms of long COVID.

### 77 **What This Study Adds**

78 Using electronic health records from US health systems, we examined large cohorts of  
79 vaccinated and unvaccinated patients <18 years old and show that vaccination against COVID-  
80 19 is associated with reduced risk of long COVID for at least 12 months.

81

82 **Contributors' Statement**

83 Drs. Hanieh Razzaghi and Charles Bailey conceptualized and designed the study, supervised  
84 analyses, drafted the initial manuscript, and critically reviewed and revised the manuscript.

85 Drs. Christopher Forrest and Yong Chen designed the study and critically reviewed and revised  
86 the manuscript.

87 Ms. Kathryn Hirabayashi, Ms. Andrea Allen, and Dr. Qiong Wu conducted analyses, and  
88 critically reviewed and revised the manuscript.

89 Drs. Suchitra Rao, H Timothy Bunnell, Elizabeth A. Chrischilles, Lindsay G. Cowell, Mollie R.  
90 Cummins, David A. Hanauer, Benjamin D. Horne, Carol R. Horowitz, Ravi Jhaveri, Susan Kim,  
91 Aaron Mishkin, Jennifer A. Muszynski, Susanna Nagie, Nathan M. Pajor, Anuradha Paranjape,  
92 Hayden T. Schwenk, , Marion R. Sills, Yacob G. Tedla , David A. Williams, and Ms. Miranda  
93 Higginbotham critically reviewed and revised the manuscript.

94 All authors approved the final manuscript as submitted and agree to be accountable for all  
95 aspects of the work.

96 **Authorship statement:** Authorship has been determined according to ICMJE recommendations.

97

98

99 **Abstract**

100 **Objective**

101 Vaccination reduces the risk of acute COVID-19 in children, but it is less clear whether it  
102 protects against long COVID. We estimated vaccine effectiveness (VE) against long COVID in  
103 children aged 5-17 years.

104 **Methods**

105 This retrospective cohort study used data from 17 health systems in the RECOVER PCORnet  
106 electronic health record (EHR) Program for visits between vaccine availability, and October 29,  
107 2022. Conditional logistic regression was used to estimate VE against long COVID with  
108 matching on age group (5-11, 12-17) and time period and adjustment for sex, ethnicity, health  
109 system, comorbidity burden, and pre-exposure health care utilization. We examined both  
110 probable (symptom-based) and diagnosed long COVID in the year following vaccination.

111 **Results**

112 The vaccination rate was 56% in the cohort of 1,037,936 children. The incidence of probable  
113 long COVID was 4.5% among patients with COVID-19, while diagnosed long COVID was  
114 0.7%. Adjusted vaccine effectiveness within 12 months was 35.4% (95 CI 24.5 – 44.5) against  
115 probable long COVID and 41.7% (15.0 – 60.0) against diagnosed long COVID. VE was higher  
116 for adolescents 50.3% [36.3 – 61.0] than children aged 5-11 (23.8% [4.9 – 39.0]). VE was  
117 higher at 6 months (61.4% [51.0 – 69.6]) but decreased to 10.6% (-26.8 – 37.0%) at 18-months.

118 **Discussion**

119 This large retrospective study shows a moderate protective effect of SARS-CoV-2 vaccination  
120 against long COVID. The effect is stronger in adolescents, who have higher risk of long  
121 COVID, and wanes over time. Understanding VE mechanism against long COVID requires more  
122 study, including EHR sources and prospective data.

123

124

125 **Introduction**

126 SARS-CoV-2 has infected over 676 million people, and has been associated with 6.9 million  
127 deaths<sup>1</sup>. While severity has been lower in children than adults, statistics for the United States  
128 (US) indicate >2100 deaths in children aged <21 years with COVID-19<sup>2</sup> and up to 2.1% of cases  
129 classified as severe disease<sup>3</sup>. Further, children may experience long-term health burdens after  
130 infection, collectively referred to as post-acute sequelae of SARS-CoV-2 (PASC) or “long  
131 COVID”<sup>4,5,6</sup>. These may represent effects of host response to the original infection in addition  
132 to or instead of direct pathogen effects<sup>7-9</sup>. Long COVID is heterogeneous and likely  
133 underdiagnosed, but symptoms such as brain fog, dyspnea, gastrointestinal dysfunction,  
134 generalized pain, and fatigue can cause significant burden for children, even after mild COVID-  
135 19<sup>4,5,10,11</sup>. Recent research has identified specific post-acute symptoms consistent with long  
136 COVID<sup>12</sup>. Prevalence estimates vary widely<sup>10,12-14</sup>. Symptoms of long COVID have been  
137 reported less often and for shorter duration in children compared to adults<sup>11</sup>, and higher rates  
138 have been reported for adolescents than younger children<sup>13</sup>. It is difficult to establish how much  
139 this results from differential reporting of symptoms at different ages, greater difficulty  
140 distinguishing long COVID from other childhood illnesses or effects of the pandemic (*e.g.*  
141 disruption of seasonal viral patterns, or of school progress)<sup>13</sup>. Despite the paucity of data about  
142 long COVID in children, developing mitigation strategies is an important concern not only for  
143 affected children but in societal discussions<sup>15</sup> and for shaping public health policy<sup>16-18</sup>.

144 Vaccines provide the best opportunity for both reducing the risk of severe disease<sup>19-24</sup> as well as  
145 short-term complications of acute infection. In adults, some reports<sup>25-29</sup> identified a modest  
146 benefit associated with vaccination in preventing long COVID in adults, while others did not<sup>30,31</sup>.

147 Little data are available on the effect of vaccination on long COVID in children; in one UK study

148 including 6500 children with COVID-19, no association was seen<sup>4</sup>. However, to our knowledge,  
149 there are no studies assessing clinical data to address this question. Efforts to learn from clinical  
150 care at a large enough scale to identify underrepresented patterns provides an important  
151 complement to multicenter prospective cohorts. The NIH Researching COVID to Enhance  
152 Recovery (RECOVER) Initiative, which seeks to understand, treat, and prevent the post-acute  
153 sequelae of SARS-CoV-2 infection (PASC, or long COVID), is employing both strategies to  
154 better elucidate the condition, identify effective ways to treat patients, and support families  
155 impacted by long COVID. We report results from a large-scale, national collaboration of health  
156 systems from the PCORnet<sup>®</sup> network contributing electronic health record (EHR) data as part of  
157 RECOVER's real-world program<sup>46</sup>.

## 158 **Methods**

159 *Data sources:* We conducted a retrospective cohort study based on EHR data from 41 health  
160 systems for children with COVID-19, a diagnosis of acute respiratory illness, fever, dyspnea, or  
161 cough, or a SARS-CoV-2 vaccine. Data, extracted quarterly, were transformed to either the  
162 PCORnet (v6.0) or Observational Medical Outcomes Partnership (OMOP) (v5.3) data models,  
163 and forwarded to the RECOVER-PCORnet Coordinating Center. For this study, we used the s8  
164 version of the data, collected in April 2023, which comprises 25,389,893 patients.

165 Institutional Review Board oversight was provided by the Biomedical Research Alliance of  
166 New York, protocol # 21-08-508-380.

167 *Study Sample:* Patients were eligible if they had an in-person visit between vaccine eligibility and  
168 October 29, 2022, and were between 5 and <18 years at the date of vaccine eligibility. The date  
169 of SARS-CoV-2 vaccine eligibility was defined as January 01, 2021, for patients aged 12 – <18  
170 years, and October 29, 2021, for patients aged 5 – <12 years, corresponding to availability of

171 vaccines. A small number of patients were excluded for documented COVID-19 before 28 days  
172 after their first vaccine dose.

173 For vaccinated patients, cohort entry was the date of their first vaccine dose, while for  
174 unvaccinated patients, the date of an in-person visit after vaccine eligibility was selected  
175 randomly, resulting in matched distribution of entry dates between cohorts. In addition, we  
176 required 1 contact between 8 days and 2 years prior to cohort entry to assess baseline health  
177 characteristics. To determine long COVID outcomes, we also required at least 1 in-person visit  
178 between 28 and 179 days after cohort entry.

179 *Outcomes:* The main outcomes were *diagnosed* or *probable* long COVID. A patient had  
180 *diagnosed* long COVID if they had two or more visits with diagnosis codes specific for long  
181 COVID; a single diagnosis code classified children as having *probable* long COVID. In  
182 addition, to account for incomplete availability or use of long-COVID-specific diagnosis codes,  
183 especially for patients with early signs of long COVID, , we also classified a patient as having  
184 *probable* long COVID if they had COVID-19 (SARS-CoV-2 PCR or antigen positive or  
185 COVID-19-specific diagnosis codes) plus at least two long-COVID-compatible diagnoses 28-  
186 179 days after infection. These diagnoses were identified in prior work as post-acute associations  
187 with COVID-19<sup>12,32</sup> (Supplemental Table S3).

188 Some results are reported for pre-omicron and omicron eras. This applies only to  
189 adolescents, as vaccines for younger children were not available substantially before the omicron  
190 era. To maintain consistency across analyses, November 29, 2021, the first day a younger child  
191 could have had a qualifying post-vaccine infection, was used as the dividing line between eras; at  
192 that point omicron was circulating in the US, and became the dominant strain a few weeks later.  
193 For each patient, the date of a SARS-CoV-2 infection following cohort entry, if one occurred,

194 was used to place their results in either of the two eras; if the patient never developed COVID-  
195 19, the date of cohort entry was used.

196 *Exposure:* The primary exposure was receipt of at least one dose of SARS-CoV-2 vaccine.  
197 Vaccine doses were ascertained using a vaccine code (CVX or RxNorm) designating an  
198 administered or patient-reported dose, a procedure code indicating SARS-CoV-2 vaccination, or  
199 a vaccine description containing the string “COVID” or “SARS”. Where available, data was  
200 retrieved from state/regional vaccine information systems via hospital operational procedures.  
201 Adequate vaccine data capture was defined as a site-reported vaccination rate at least 60% of the  
202 CDC-estimated rate<sup>2</sup> for its coverage area, based on addresses of patients seen during the  
203 pandemic. Where dose counts were used, all recorded doses within 14 days of a base dose were  
204 considered a single dose.

205 *Demographic and clinical data.* Age, sex, and ethnicity were taken from EHRs. Comorbidity  
206 data used the body system taxonomy of the Pediatric Medical Complexity Algorithm (PMCA)<sup>14</sup>.  
207 Diagnoses received up to 3 years before cohort entry were considered. To classify patients as  
208 complex-chronic, chronic, or no chronic condition, the “more conservative” version of the  
209 algorithm was applied.

210 *Main analysis.* We matched vaccinated and unvaccinated patients on age group at cohort  
211 entry (5-11, 12-17) and time period (six-month cohort entry period). We limited long COVID  
212 observations to 12 months following cohort entry to account for waning of vaccine effectiveness  
213 (VE) over time.

214 *Sensitivity analyses:* To evaluate potential impact of attrition due to matching, we  
215 performed a sensitivity analysis using inverse probability of treatment weighting that  
216 incorporated age group, time of cohort entry, sex, ethnicity, health system, number of baseline



217 visits to the health system, PMCA-defined body system(s) affected by chronic illness,  
218 progressive disease, and malignancy. Further, we estimated VE after changing the window for  
219 outcomes to 6 months and 18 months post cohort entry and restricting the vaccinated cohort to  
220 those with at least 2 recorded doses.

221 *Cohort Comparison.* For unadjusted analyses, follow-up time was computed from cohort  
222 entry until the end of observation. We calculated an incidence rate ratio (IRR) comparing  
223 vaccinated to unvaccinated groups and derived 95% CIs using the estimation of Wald<sup>33</sup>.  
224 Corresponding VE was computed as  $100 \times (1 - \text{IRR})$ .

225 For adjusted analyses, we used conditional logistic regression to account for stratification.  
226 Covariates included sex, ethnicity, health system, baseline utilization (0, 1-5, 6-10, 11-24, 25-49,  
227 50-99, or 100+ encounters in the 3 years prior to cohort entry), the number of PMCA body  
228 systems affected, and the presence of progressive or malignant condition. Since the prevalence of  
229 long COVID was low,  $\text{IRR} \approx \text{OR}$ , so the corresponding VE was computed as  $100 \times (1 - \text{OR})$ .

230 *Mediation Analyses.* To understand the direct and indirect impact of vaccination on long  
231 COVID, we conducted causal mediation analyses, where the treatment was pre-infection  
232 vaccination, the mediator was SARS-CoV-2 infection, and the outcome was long COVID. We fit  
233 two logistic regression models, the first of treatment on the mediator, and the second of treatment  
234 and mediator on the outcome, adjusting for the same set of covariates. From these models, we  
235 estimated the effect and CIs of vaccination on long COVID independent of infection, and of  
236 vaccination on long COVID mediated by infection.

237 *Statistical Tools.* Data analysis was performed using R<sup>17</sup> version 4.0.2. Exact matching  
238 used the `matchIt` package<sup>34</sup> version 4.4.0, while IPTW were computed via `twang`<sup>35</sup> version

239 2.5. Conditional logistic regression used the `clogit()` algorithm implemented in the  
240 `survival` package<sup>36</sup> version 3.5. Significant effects were identified based on a threshold of  
241  $\alpha < 0.05$ .

## 242 **Results**

### 243 *Study Cohort*

244 Immunization data from 17 health systems was sufficiently robust for inclusion. Cohort  
245 formation is described in Figure 1: the 5–11-year-old group comprised 480,498 children, while  
246 the 12-17 year-old group comprised 719,519 children/adolescents. Overall, 55% received at  
247 least one SARS-CoV-2 vaccine, and 84% of vaccinated children received two or more doses.  
248 Compared to unvaccinated children, vaccinated patients were older, had lower baseline  
249 healthcare utilization, and fewer chronic conditions. Girls and children who identified as Asian  
250 or Hispanic were more common in the vaccinated group, while those identifying as Black and  
251 White were less common (Table 1). Descriptive statistics for the matched cohorts are provided in  
252 Supplemental Table S1. Vaccinated patients had slightly fewer comorbidities and healthcare  
253 utilization than unvaccinated patients. The prevalence of probable long COVID was 0.3% in the  
254 cohort overall; for children with COVID-19 after cohort entry, prevalence of diagnosed long  
255 COVID was 0.8%, and adding probable cases raised the prevalence of long COVID to 4.5%.

### 256 *Effect of Vaccination on long COVID in Children and Adolescents*

257 While the likelihood that a recorded vaccine is incorrectly attributed to a patient is very low, the  
258 risk that dose count is incomplete in reported data is well-described<sup>37</sup>, and discontinuation before  
259 a second dose is uncommon. It is therefore more accurate in this study design to include patients  
260 with evidence of vaccination, and, because any compensatory bias introduced thereby will tend  
261 to reduce estimates, more responsible to report results that do not overestimate vaccine

262 effectiveness. We analyzed all children with evidence of vaccination prior to SARS-CoV-2  
263 infection. Results were very similar across approaches: VE was 35% (95% CI 24– 45%) for the  
264 combined age groups (Table 2), with greater effect in adolescents than younger children. For  
265 children known to be completely vaccinated (*i.e.* 2+ doses) prior to SARS-CoV-2 infection, VE  
266 was 35% (95% CI 35– 53%) against probable long COVID within 12 months (Figure 2), with  
267 consistent findings within age strata, supporting the validity of our approach. For comparison,  
268 VE estimates against SARS-CoV-2 infection are shown in Supplemental Figure S1. We  
269 observed decreased likelihood of long COVID among boys and children with non-Hispanic  
270 Black or Asian ethnicity (Supplementary Table S2). The presence of chronic conditions had  
271 minimal effect, though likelihood of long COVID rose with increasing baseline utilization.  
272 The protective effect of vaccination appeared to wane over time. We observed higher VE  
273 against long COVID within 6 months of vaccination than 12 months, while extending the  
274 observation period to 18 months revealed a further diminution (Figure 3). Protection was also  
275 seen in children who started vaccination after recuperating from COVID-19 (Supplemental  
276 Figure S2).

277 One-to-one matching resulted in loss of 27% of unvaccinated and 64% of vaccinated patients due  
278 to the high overall vaccination rate. To assess the effect of this on our VE estimates, we used  
279 IPTW to adjust for multiple potential confounders without decreasing cohort size. Once again, a  
280 protective effect was seen, though with a smaller magnitude of 24% (95% CI 20 – 28%) for  
281 vaccination on long COVID up to a year later (Supplemental Figure S3).

282 To assess where in the path to long COVID the vaccine might have impact, we performed  
283 mediation analysis, estimating effect of vaccine on long COVID via change in COVID-19 risk  
284 (indirect effect) separately from other effects on long COVID (direct effect). For 5–11-year-

285 olds, who became vaccine eligible just before the omicron variant became prevalent, the long  
286 COVID-associated OR for indirect effect on probable long COVID was 0.67 (95% CI 0.64 –  
287 0.70), while for direct effect the OR was 1.34 (95% CI 1.13 – 1.59). For adolescents, results  
288 were similar: in the pre-omicron era the indirect effect OR was 0.46 (95% CI 0.45 – 0.48) and  
289 direct effect OR was 1.32 (95% CI 1.12 – 1.55); in the omicron era, the analogous ORs were  
290 0.45 (95% CI 0.41 – 0.49) and 0.99 (95% CI 0.73 – 1.34). These results suggest that throughout  
291 the period of pediatric use, the effectiveness of vaccine against long COVID is closely tied to its  
292 effectiveness against the antecedent COVID-19 episode.

## 293 **Discussion**

294 To our knowledge, this national-scale study, with a diverse cohort of over 1 million children, is  
295 the first to estimate the VE against long COVID in children. Our findings suggest that SARS-  
296 CoV-2 vaccine is associated with reduced risk of Long COVID in children and adolescents. The  
297 protective effect was greater among adolescents than younger children, reflecting activity against  
298 delta and omicron strains, while use for younger children is limited to the omicron era. Since  
299 diagnostic codes for long COVID (*e.g.* ICD-10-CM U09.9) are rare in children, we have  
300 examined both specific diagnosis as an outcome, and a broader definition based on the repeated  
301 presence from 1-6 months after infection of symptoms that occur more frequently following  
302 COVID-19 than in uninfected children<sup>12,32</sup>. The effect of vaccine is similar for both outcomes  
303 and is also seen in children vaccinated after an initial episode of COVID-19, suggesting that  
304 vaccination confers some benefit against future late effects. Mediation analysis suggests that the  
305 protective effect of vaccination may be primarily via reduction in the occurrence or severity of  
306 infection.

307 Our finding of a protective effect against long COVID in children are consistent with those  
308 observed in adults, while the VE estimates in our study are lower than studies assessing the  
309 short-term effect of vaccines in the one week to one month after vaccination <sup>29</sup>. Other reasons are  
310 varied definitions of long COVID between these studies, and different methodological  
311 approaches. Our observed higher VE for adolescents is similar to studies examining acute  
312 infection <sup>38</sup>. Further analyses are required to explore whether other factors contribute to this  
313 difference, such as long COVID symptoms being more frequently reported or documented in  
314 adolescents.

315 Waning effects of vaccine against long COVID are to be expected <sup>39</sup>, similar to studies against  
316 acute infection <sup>40 41 42</sup>. The reasons include reduced neutralization efficiency against newer  
317 strains and waning of pre-existing antibodies over time <sup>43</sup>. It is also possible that long COVID  
318 starting several months after acute infection, or delayed diagnosis or recognition of long COVID,  
319 may contribute to this phenomenon. Further, waning effect may reflect the impact of successive  
320 infections rather than late-onset long COVID. This is difficult to assess analytically, given fewer  
321 COVID-19 episodes are being documented in the EHR during the omicron era. Evaluations of  
322 VE over time are needed to address whether these waning effects can be overcome through  
323 booster or annual vaccine doses.

324 VE studies using EHR data rely on accurate capture of clinical and vaccine data, with adjustment  
325 for important confounders to minimize potential bias <sup>44 45</sup>. Our focus on data quality, including  
326 comparison to the CDC's county-level vaccination data, reduced our cohort size but yielded  
327 more reliable vaccination data. Our assessment of VE against acute SARS-CoV-2 was similar to  
328 VE estimates from other pediatric studies, further validating our findings and approach. Finally,

329 we performed matching on age and time period to limit secular effects and conducted sensitivity  
330 analyses including inverse probability of treatment weighting, with similar findings.

331 Nonetheless, several challenges exist with the identification of long COVID in children using  
332 EHR data, which may confound assessment of our outcome. There has been low uptake of the  
333 long COVID (ICD10-CM U09.9) diagnosis code in pediatrics; it is more often seen in older  
334 children and associated with respiratory, cardiovascular, or fatigue subtypes of long COVID<sup>32</sup>.  
335 For this reason, we supplemented our outcome definition with a symptom-based computable  
336 phenotype definition of long COVID we have developed, which includes features related to long  
337 COVID based on statistical association and chart review validation<sup>12,32</sup>. However, long COVID  
338 presentations are heterogeneous, and symptoms and conditions may overlap with other childhood  
339 illnesses, with the potential for misclassification of long COVID in our study. These limitations  
340 on classification accuracy are expected to affect both vaccinated and unvaccinated cohorts,  
341 similarly, so would not confound the comparison of the two.

342 There are other limitations that warrant discussion. First, our study relies on secondary use of  
343 EHR data, and is subject to bias due to differential access to and utilization of healthcare during  
344 the pandemic, as well as clinical practice variation across sites. We required both pre- and post-  
345 vaccine visits to establish a baseline of utilization, which may create bias toward sicker patients,  
346 but importantly we did not observe major imbalances in utilization rates between cohorts. Next,  
347 testing practices changed over time, with an increased reliance on home antigen testing in later  
348 phases of the pandemic, potentially leading to misclassification of symptom based long COVID.  
349 In addition, a large proportion of patients in our data with a long COVID diagnosis code do not  
350 have documentation in the EHR of the antecedent COVID-19 episode, which prevented use of  
351 severity as an adjustment to vaccine effect.

## 352 Conclusion

353 Our results provide substantial evidence in a large and diverse cohort of children receiving health  
354 care for protective effect in children 5 years and older. This study adds to the growing body of  
355 knowledge about mitigating effect of vaccines on COVID-19, while demonstrating the need for  
356 further research utilizing a range of designs to examine the protective effect of these vaccines  
357 against subsequent strains and to help guide vaccine policy.

## 358 Acknowledgments

359  
360 We are grateful to the health systems, clinicians, and patients at member sites without  
361 whose trust research of this type would not be possible. We are also grateful to clinical data  
362 teams at each RECOVER site involved in data extraction and integration, as well as colleagues at  
363 the RECOVER Coordinating Center, particularly Susan Hague, for maintaining the RECOVER  
364 data infrastructure. Additionally, we would like to thank the National Community Engagement  
365 Group (NCEG), all patient, caregiver and community Representatives, and all the participants  
366 enrolled in the RECOVER Initiative  
367

## 368 References

- 369 1. Johns Hopkins University. COVID-19 dashboard by the Center for Systems Science and  
370 Engineering (CSSE) at Johns Hopkins University (JHU). Accessed March 04, 2023.  
371 <https://coronavirus.jhu.edu/map.html>
- 372 2. Centers for Disease Control and Prevention (CDC). CDC COVID Data Tracker.  
373 Accessed March 04, 2023. <https://covid.cdc.gov/covid-data-tracker/#demographics>
- 374 3. Forrest CB, Burrows EK, Mejias A, et al. Severity of Acute COVID-19 in Children <18  
375 Years Old March 2020 to December 2021. *Pediatrics*. Apr 1 2022;149(4)doi:10.1542/peds.2021-  
376 055765
- 377 4. Pinto Pereira SM, Nugawela MD, Rojas NK, et al. Post-COVID-19 condition at 6 months  
378 and COVID-19 vaccination in non-hospitalised children and young people. *Arch Dis Child*. Apr  
379 2023;108(4):289-295. doi:10.1136/archdischild-2022-324656
- 380 5. Trapani G, Verlatto G, Bertino E, et al. Long COVID-19 in children: an Italian cohort  
381 study. *Ital J Pediatr*. Jun 3 2022;48(1):83. doi:10.1186/s13052-022-01282-x
- 382 6. Davis HE, McCorkell L, Vogel JM, Topol EJ. Long COVID: major findings,  
383 mechanisms and recommendations. *Nat Rev Microbiol*. Mar 2023;21(3):133-146.  
384 doi:10.1038/s41579-022-00846-2
- 385 7. Kuczborska K, Buda P, Ksiazek J. Long-COVID in immunocompromised children. *Eur J*  
386 *Pediatr*. Sep 2022;181(9):3501-3509. doi:10.1007/s00431-022-04561-1
- 387 8. Pierce CA, Herold KC, Herold BC, et al. COVID-19 and children. *Science*. Sep 9  
388 2022;377(6611):1144-1149. doi:10.1126/science.ade1675
- 389 9. Molloy EJ, Nakra N, Gale C, Dimitriades VR, Lakshminrusimha S. Multisystem  
390 inflammatory syndrome in children (MIS-C) and neonates (MIS-N) associated with COVID-19:

- 391 optimizing definition and management. *Pediatr Res*. May 2023;93(6):1499-1508.  
392 doi:10.1038/s41390-022-02263-w
- 393 10. Say D, Crawford N, McNab S, Wurzel D, Steer A, Tosif S. Post-acute COVID-19  
394 outcomes in children with mild and asymptomatic disease. *Lancet Child Adolesc Health*. Jun  
395 2021;5(6):e22-e23. doi:10.1016/S2352-4642(21)00124-3
- 396 11. Mizrahi B, Sudry T, Flaks-Manov N, et al. Long covid outcomes at one year after mild  
397 SARS-CoV-2 infection: nationwide cohort study. *BMJ*. Jan 11 2023;380:e072529.  
398 doi:10.1136/bmj-2022-072529
- 399 12. Rao S, Lee GM, Razzaghi H, et al. Clinical Features and Burden of Postacute Sequelae of  
400 SARS-CoV-2 Infection in Children and Adolescents. *JAMA Pediatr*. Aug 22  
401 2022;doi:10.1001/jamapediatrics.2022.2800
- 402 13. Adler L, Israel M, Yehoshua I, et al. Long COVID symptoms in Israeli children with and  
403 without a history of SARS-CoV-2 infection: a cross-sectional study. *BMJ Open*. Feb 21  
404 2023;13(2):e064155. doi:10.1136/bmjopen-2022-064155
- 405 14. Funk AL, Kuppermann N, Florin TA, et al. Post-COVID-19 Conditions Among Children  
406 90 Days After SARS-CoV-2 Infection. *JAMA Netw Open*. Jul 1 2022;5(7):e2223253.  
407 doi:10.1001/jamanetworkopen.2022.23253
- 408 15. Katika A, Zoulias E, Koufi V, Malamateniou F. Mining Greek Tweets on Long COVID  
409 Using Sentiment Analysis and Topic Modeling. *Stud Health Technol Inform*. Jun 29  
410 2023;305:545-548. doi:10.3233/SHTI230554
- 411 16. Kasi SG, Dhir SK, Shah A, et al. Coronavirus Disease 2019 (COVID-19) Vaccination for  
412 Children: Position Statement of Indian Academy of Pediatrics Advisory Committee on  
413 Vaccination and Immunization Practices. *Indian Pediatr*. Jan 15 2022;59(1):51-57.  
414 doi:10.1007/s13312-022-2421-9
- 415 17. Barie PS, Brindle ME, Khadaroo RG, Klassen TL, Huston JM. Omicron, Long-COVID,  
416 and the Safety of Elective Surgery for Adults and Children: Joint Guidance from the  
417 Therapeutics and Guidelines Committee of the Surgical Infection Society and the Surgery  
418 Strategic Clinical Network, Alberta Health Services. *Surg Infect (Larchmt)*. Feb 2023;24(1):6-  
419 18. doi:10.1089/sur.2022.274
- 420 18. Paul S, Mishra CM. Do we need to vaccinate every child against COVID-19: What  
421 evidence suggests-A systematic review of opinions. *Front Public Health*. 2022;10:1002992.  
422 doi:10.3389/fpubh.2022.1002992
- 423 19. Baden LR, El Sahly HM, Essink B, et al. Efficacy and Safety of the mRNA-1273 SARS-  
424 CoV-2 Vaccine. *N Engl J Med*. Feb 4 2021;384(5):403-416. doi:10.1056/NEJMoa2035389
- 425 20. El Sahly HM, Baden LR, Essink B, et al. Efficacy of the mRNA-1273 SARS-CoV-2  
426 Vaccine at Completion of Blinded Phase. *N Engl J Med*. Nov 4 2021;385(19):1774-1785.  
427 doi:10.1056/NEJMoa2113017
- 428 21. Thomas SJ, Moreira ED, Jr., Kitchin N, et al. Safety and Efficacy of the BNT162b2  
429 mRNA Covid-19 Vaccine through 6 Months. *N Engl J Med*. Nov 4 2021;385(19):1761-1773.  
430 doi:10.1056/NEJMoa2110345
- 431 22. Elliott P, Haw D, Wang H, et al. Exponential growth, high prevalence of SARS-CoV-2,  
432 and vaccine effectiveness associated with the Delta variant. *Science*. Dec 17  
433 2021;374(6574):eab19551. doi:10.1126/science.ab19551
- 434 23. Gray G, Collie S, Goga A, et al. Effectiveness of Ad26.COV2.S and BNT162b2  
435 Vaccines against Omicron Variant in South Africa. *N Engl J Med*. Jun 9 2022;386(23):2243-  
436 2245. doi:10.1056/NEJMc2202061



- 437 24. Tseng HF, Ackerson BK, Luo Y, et al. Effectiveness of mRNA-1273 against SARS-  
438 CoV-2 Omicron and Delta variants. *Nat Med.* May 2022;28(5):1063-1071. doi:10.1038/s41591-  
439 022-01753-y
- 440 25. Al-Aly Z, Bowe B, Xie Y. Long COVID after breakthrough SARS-CoV-2 infection. *Nat*  
441 *Med.* Jul 2022;28(7):1461-1467. doi:10.1038/s41591-022-01840-0
- 442 26. Brannock MD, Chew RF, Preiss AJ, et al. Long COVID risk and pre-COVID vaccination  
443 in an EHR-based cohort study from the RECOVER program. *Nat Commun.* May 22  
444 2023;14(1):2914. doi:10.1038/s41467-023-38388-7
- 445 27. Taquet M, Dercon Q, Harrison PJ. Six-month sequelae of post-vaccination SARS-CoV-2  
446 infection: A retrospective cohort study of 10,024 breakthrough infections. *Brain Behav Immun.*  
447 Jul 2022;103:154-162. doi:10.1016/j.bbi.2022.04.013
- 448 28. Ayoubkhani D, Bermingham C, Pouwels KB, et al. Trajectory of long covid symptoms  
449 after covid-19 vaccination: community based cohort study. *BMJ.* May 18 2022;377:e069676.  
450 doi:10.1136/bmj-2021-069676
- 451 29. Notarte KI, Catahay JA, Velasco JV, et al. Impact of COVID-19 vaccination on the risk  
452 of developing long-COVID and on existing long-COVID symptoms: A systematic review.  
453 *EClinicalMedicine.* Nov 2022;53:101624. doi:10.1016/j.eclinm.2022.101624
- 454 30. Arjun MC, Singh AK, Pal D, et al. Characteristics and predictors of Long COVID among  
455 diagnosed cases of COVID-19. *PLoS One.* 2022;17(12):e0278825.  
456 doi:10.1371/journal.pone.0278825
- 457 31. Wynberg E, Han AX, Boyd A, et al. The effect of SARS-CoV-2 vaccination on post-  
458 acute sequelae of COVID-19 (PASC): A prospective cohort study. *Vaccine.* Jul 30  
459 2022;40(32):4424-4431. doi:10.1016/j.vaccine.2022.05.090
- 460 32. Lorman V, Rao S, Jhaveri R, et al. Understanding pediatric long COVID using a tree-  
461 based scan statistic approach: an EHR-based cohort study from the RECOVER Program. *JAMIA*  
462 *Open.* Apr 2023;6(1):ooad016. doi:10.1093/jamiaopen/ooad016
- 463 33. Sahai H, Khurshid A. *Statistics in epidemiology : methods, techniques, and applications.*  
464 CRC Press; 1996:321 p.
- 465 34. Ho D, Imai K, King G, Stuart EA. MatchIt: Nonparametric Preprocessing for Parametric  
466 Causal Inference. *Journal of Statistical Software.* 06/14 2011;42(8):1 - 28.  
467 doi:10.18637/jss.v042.i08
- 468 35. Ridgeway GM, D. F.; Morral, A. R.; Cefalu, M.; Burgette, L. F.; Pane, J. D.; Griffin, B.  
469 A. *Toolkit for Weighting and Analysis of Nonequivalent Groups: A Tutorial for the R TWANG*  
470 *Package.* 2022.
- 471 36. Therneau TM. A Package for Survival Analysis in R. Accessed 2023-08-07, 2023.
- 472 37. Centers for Disease Control and Prevention Data (CDC). Definitions for COVID-19  
473 Vaccinations in the United States. Accessed August 25, 2022.  
474 [https://www.cdc.gov/coronavirus/2019-ncov/vaccines/reporting-](https://www.cdc.gov/coronavirus/2019-ncov/vaccines/reporting-vaccinations.html#anchor_1649867074684)  
475 [vaccinations.html#anchor\\_1649867074684](https://www.cdc.gov/coronavirus/2019-ncov/vaccines/reporting-vaccinations.html#anchor_1649867074684)
- 476 38. Fowlkes AL, Yoon SK, Lutrick K, et al. Effectiveness of 2-Dose BNT162b2 (Pfizer  
477 BioNTech) mRNA Vaccine in Preventing SARS-CoV-2 Infection Among Children Aged 5-11  
478 Years and Adolescents Aged 12-15 Years - PROTECT Cohort, July 2021-February 2022.  
479 *MMWR Morb Mortal Wkly Rep.* Mar 18 2022;71(11):422-428. doi:10.15585/mmwr.mm7111e1
- 480 39. Yewdell JW. Individuals cannot rely on COVID-19 herd immunity: Durable immunity to  
481 viral disease is limited to viruses with obligate viremic spread. *PLoS Pathog.* Apr  
482 2021;17(4):e1009509. doi:10.1371/journal.ppat.1009509

- 483 40. Klein NP, Demarco M, Fleming-Dutra KE, et al. Effectiveness of BNT162b2 COVID-19  
484 Vaccination in Children and Adolescents. *Pediatrics*. May 1 2023;151(5)doi:10.1542/peds.2022-  
485 060894
- 486 41. Price AM, Olson SM, Newhams MM, et al. BNT162b2 Protection against the Omicron  
487 Variant in Children and Adolescents. *N Engl J Med*. May 19 2022;386(20):1899-1909.  
488 doi:10.1056/NEJMoa2202826
- 489 42. Tan SHX, Cook AR, Heng D, Ong B, Lye DC, Tan KB. Effectiveness of BNT162b2  
490 Vaccine against Omicron in Children 5 to 11 Years of Age. *N Engl J Med*. Aug 11  
491 2022;387(6):525-532. doi:10.1056/NEJMoa2203209
- 492 43. Lipsitch M, Krammer F, Regev-Yochay G, Lustig Y, Balicer RD. SARS-CoV-2  
493 breakthrough infections in vaccinated individuals: measurement, causes and impact. *Nat Rev*  
494 *Immunol*. Jan 2022;22(1):57-65. doi:10.1038/s41577-021-00662-4
- 495 44. Sullivan SG, Tchetgen Tchetgen EJ, Cowling BJ. Theoretical Basis of the Test-Negative  
496 Study Design for Assessment of Influenza Vaccine Effectiveness. *Am J Epidemiol*. Sep 1  
497 2016;184(5):345-53. doi:10.1093/aje/kww064
- 498 45. Lipsitch M, Jha A, Simonsen L. Observational studies and the difficult quest for  
499 causality: lessons from vaccine effectiveness and impact studies. *Int J Epidemiol*. Dec 1  
500 2016;45(6):2060-2074. doi:10.1093/ije/dyw124
- 501 46. RECOVER: Researching COVID to Enhance Recovery. (n.d.). RECOVER: Researching  
502 COVID to Enhance Recovery. <https://recovercovid.org/>

503

504 **Table 1. Cohort Description for Full Cohort**

|                                       | <b>Vaccinated<br/>(N = 692912)</b> | <b>Unvaccinated<br/>(N = 345024)</b> | <b>Overall<br/>(N = 1037936)</b> |
|---------------------------------------|------------------------------------|--------------------------------------|----------------------------------|
| <b>Race/Ethnicity</b>                 |                                    |                                      |                                  |
| Asian                                 | 45267 (6.5%)                       | 8380 (2.4%)                          | 53647 (5.2%)                     |
| Black/AA (non-Hispanic)               | 84642 (12.2%)                      | 63183 (18.3%)                        | 147825 (14.2%)                   |
| Hispanic                              | 168102 (24.3%)                     | 70976 (20.6%)                        | 239078 (23.0%)                   |
| Multiple/Other/<br>Missing/Unknown    | 91494 (13.2%)                      | 36674 (10.6%)                        | 128168 (12.3%)                   |
| White (non-Hispanic)                  | 303407 (43.8%)                     | 165811 (48.1%)                       | 469218 (45.2%)                   |
| <b>Age (yr) at Entry<sup>a</sup></b>  |                                    |                                      |                                  |
| Mean (SD)                             | 12.4 (3.58)                        | 11.1 (3.66)                          | 11.9 (3.65)                      |
| Median [Min, Max]                     | 12.8 [5.02, 18.0]                  | 11.0 [5.01,<br>18.0]                 | 12.2 [5.01, 18.0]                |
| <b>Age Group at Entry<sup>a</sup></b> |                                    |                                      |                                  |
| 5-11 years                            | 279279 (40.3%)                     | 201019 (58.3%)                       | 480298 (46.3%)                   |
| 12-17 years                           | 413633 (59.7%)                     | 144005 (41.7%)                       | 557638 (53.7%)                   |
| <b>Sex</b>                            |                                    |                                      |                                  |
| Female/Missing                        | 353971 (51.1%)                     | 168787 (48.9%)                       | 522758 (50.4%)                   |
| Male                                  | 338941 (48.9%)                     | 176237 (51.1%)                       | 515178 (49.6%)                   |

|                                                | <b>Vaccinated<br/>(N = 692912)</b> | <b>Unvaccinated<br/>(N = 345024)</b> | <b>Overall<br/>(N = 1037936)</b> |
|------------------------------------------------|------------------------------------|--------------------------------------|----------------------------------|
| <b>Time Period of Entry<sup>a</sup></b>        |                                    |                                      |                                  |
| Dec 2020 – May 2021                            | 197799 (28.5%)                     | 38763 (11.2%)                        | 236562 (22.8%)                   |
| Jun – Nov 2021                                 | 319605 (46.1%)                     | 65391 (19.0%)                        | 384996 (37.1%)                   |
| Dec 2021 – May 2022                            | 157720 (22.8%)                     | 135878 (39.4%)                       | 293598 (28.3%)                   |
| Jun – Nov 2022                                 | 17788 (2.6%)                       | 104992 (30.4%)                       | 122780 (11.8%)                   |
| <b>In-Person Visits in<br/>Baseline Period</b> |                                    |                                      |                                  |
| 00 visits <sup>b</sup>                         | 44741 (6.5%)                       | 12236 (3.5%)                         | 56977 (5.5%)                     |
| 01 to 05 visits                                | 261683 (37.8%)                     | 122599 (35.5%)                       | 384282 (37.0%)                   |
| 06 to 10 visits                                | 168774 (24.4%)                     | 90751 (26.3%)                        | 259525 (25.0%)                   |
| 11 to 24 visits                                | 149470 (21.6%)                     | 83087 (24.1%)                        | 232557 (22.4%)                   |
| ≥25 visits                                     | 68244 (9.9%)                       | 36351 (10.5%)                        | 104595 (10.1%)                   |
| <b>Chronic Disease Category<sup>c</sup></b>    |                                    |                                      |                                  |
| Non-complex Chronic                            | 63877 (9.2%)                       | 33448 (9.7%)                         | 97325 (9.4%)                     |
| Complex Chronic                                | 20983 (3.0%)                       | 12903 (3.7%)                         | 33886 (3.3%)                     |
| None                                           | 608052 (87.8%)                     | 298673 (86.6%)                       | 906725 (87.4%)                   |
| <b>Progressive Condition<sup>c</sup></b>       |                                    |                                      |                                  |
| No                                             | 654097 (94.4%)                     | 321720 (93.2%)                       | 975817 (94.0%)                   |
| Yes                                            | 38815 (5.6%)                       | 23304 (6.8%)                         | 62119 (6.0%)                     |
| <b>Malignancy<sup>c</sup></b>                  |                                    |                                      |                                  |
| No                                             | 687759 (99.3%)                     | 341609 (99.0%)                       | 1029368 (99.2%)                  |
| Yes                                            | 5153 (0.7%)                        | 3415 (1.0%)                          | 8568 (0.8%)                      |
| <b>Institution</b>                             |                                    |                                      |                                  |
| A                                              | 23144 (3.3%)                       | 14769 (4.3%)                         | 37913 (3.7%)                     |
| B                                              | 65697 (9.5%)                       | 29160 (8.5%)                         | 94857 (9.1%)                     |
| C                                              | 142143 (20.5%)                     | 43523 (12.6%)                        | 185666 (17.9%)                   |
| D                                              | 65036 (9.4%)                       | 46009 (13.3%)                        | 111045 (10.7%)                   |
| E                                              | 15003 (2.2%)                       | 3495 (1.0%)                          | 18498 (1.8%)                     |
| F                                              | 109402 (15.8%)                     | 55253 (16.0%)                        | 164655 (15.9%)                   |
| G                                              | 17214 (2.5%)                       | 2057 (0.6%)                          | 19271 (1.9%)                     |
| H                                              | 335 (0.0%)                         | 1696 (0.5%)                          | 2031 (0.2%)                      |
| I                                              | 47910 (6.9%)                       | 33443 (9.7%)                         | 81353 (7.8%)                     |
| J                                              | 26925 (3.9%)                       | 12387 (3.6%)                         | 39312 (3.8%)                     |
| K                                              | 45811 (6.6%)                       | 17818 (5.2%)                         | 63629 (6.1%)                     |
| L                                              | 39651 (5.7%)                       | 42678 (12.4%)                        | 82329 (7.9%)                     |
| M                                              | 14732 (2.1%)                       | 11696 (3.4%)                         | 26428 (2.5%)                     |
| N                                              | 2416 (0.3%)                        | 1371 (0.4%)                          | 3787 (0.4%)                      |
| O                                              | 13352 (1.9%)                       | 6928 (2.0%)                          | 20280 (2.0%)                     |

|   | <b>Vaccinated<br/>(N = 692912)</b> | <b>Unvaccinated<br/>(N = 345024)</b> | <b>Overall<br/>(N = 1037936)</b> |
|---|------------------------------------|--------------------------------------|----------------------------------|
| P | 23249 (3.4%)                       | 7076 (2.1%)                          | 30325 (2.9%)                     |
| Q | 14418 (2.1%)                       | 8021 (2.3%)                          | 22439 (2.2%)                     |
| R | 26474 (3.8%)                       | 7644 (2.2%)                          | 34118 (3.3%)                     |

505 <sup>a</sup> Vaccination date or visit date if unvaccinated

506 <sup>b</sup> Patients with baseline eligibility data based on administrative (*e.g.* telephone) visits

507 <sup>c</sup> Based on PMCA

508

509 **Table 2. SARS-CoV-2 Vaccine Effectiveness Against Long COVID**

510

|                                              | N <sup>a</sup> | <b>Vaccine Effectiveness (%), 95% CI</b> |                             |
|----------------------------------------------|----------------|------------------------------------------|-----------------------------|
|                                              |                | <b>Unadjusted</b>                        | <b>Adjusted<sup>b</sup></b> |
| <b>Symptom-based or Diagnosed long COVID</b> |                |                                          |                             |
| Child (5-11 y),<br>omicron                   | 753            | 19.7 (7.1 – 30.6)                        | 23.8 (4.9 – 39.0)           |
| Adolescent (12-17 y),<br>all patients        | 961            | 28.7 (18.8 – 37.4)                       | 50.3 (36.6 – 61.0)          |
| Adolescent (12-17 y),<br>pre-omicron         | 726            |                                          | 35.3 (4.8 – 56.0)           |
| Adolescent (12-17y),<br>omicron              |                |                                          | 58.7 (39.1 – 72.0)          |
| All ages (5-17 y)                            | 1,669          | 25.3 (17.6 – 32.2)                       | 35.4 (24.5 – 44.5)          |
| <b>Diagnosed long COVID only</b>             |                |                                          |                             |
| Child (5-11 y)                               | 82             | 16 (-32.7 – 46.9)                        | 48.2 (-.21 – 77.8)          |
| Adolescent (12-17 y)                         | 194            | 41.7 (21.4 – 57.0)                       | 56.1 (25.8 – 74.0)          |
|                                              |                |                                          |                             |
| All ages (5-17 y)                            | 270            | 35.6 (17.4 – 50.0)                       | 41.7 (15.0 – 60.0)          |

511 <sup>a</sup> Cases of long COVID. Note that values for 5-11 and 12-17 year age strata do not sum to the value for  
512 5-17 as each stratum is drawn from sites with usable vaccine data for all ages in that stratum.

513 <sup>b</sup> Adjusted for sex, ethnicity, health system, baseline utilization in the 3 years prior to cohort entry, the  
514 number of body systems affected in the same interval, and the presence of a condition defined in the  
515 PMCA as either progressive or malignant

516

517

518

519

520

521

522 **Figure 1: Study Sample Selection.** Steps in the construction of the overall study sample are  
523 shown, including demographic and vaccine-related eligibility criteria. At each step, the number  
524 of children satisfying all criteria to that point is shown, as is the percentage of children in the  
525 previous step who were retained. <sup>a</sup> Vaccination rates  $\geq 70\%$  of CDC regional estimate

526 **Figure 2. Vaccine effectiveness estimates for children receiving at least 2 doses of mRNA**  
527 **vaccine in their primary series.** Analyses were otherwise structured identically to the main  
528 analysis.

529 **Figure 3. Durability of vaccine effectiveness of SARS-CoV-2 vaccine against long COVID.**  
530 Results are shown for PASC occurring within 6, 12, or 18 months of vaccination.

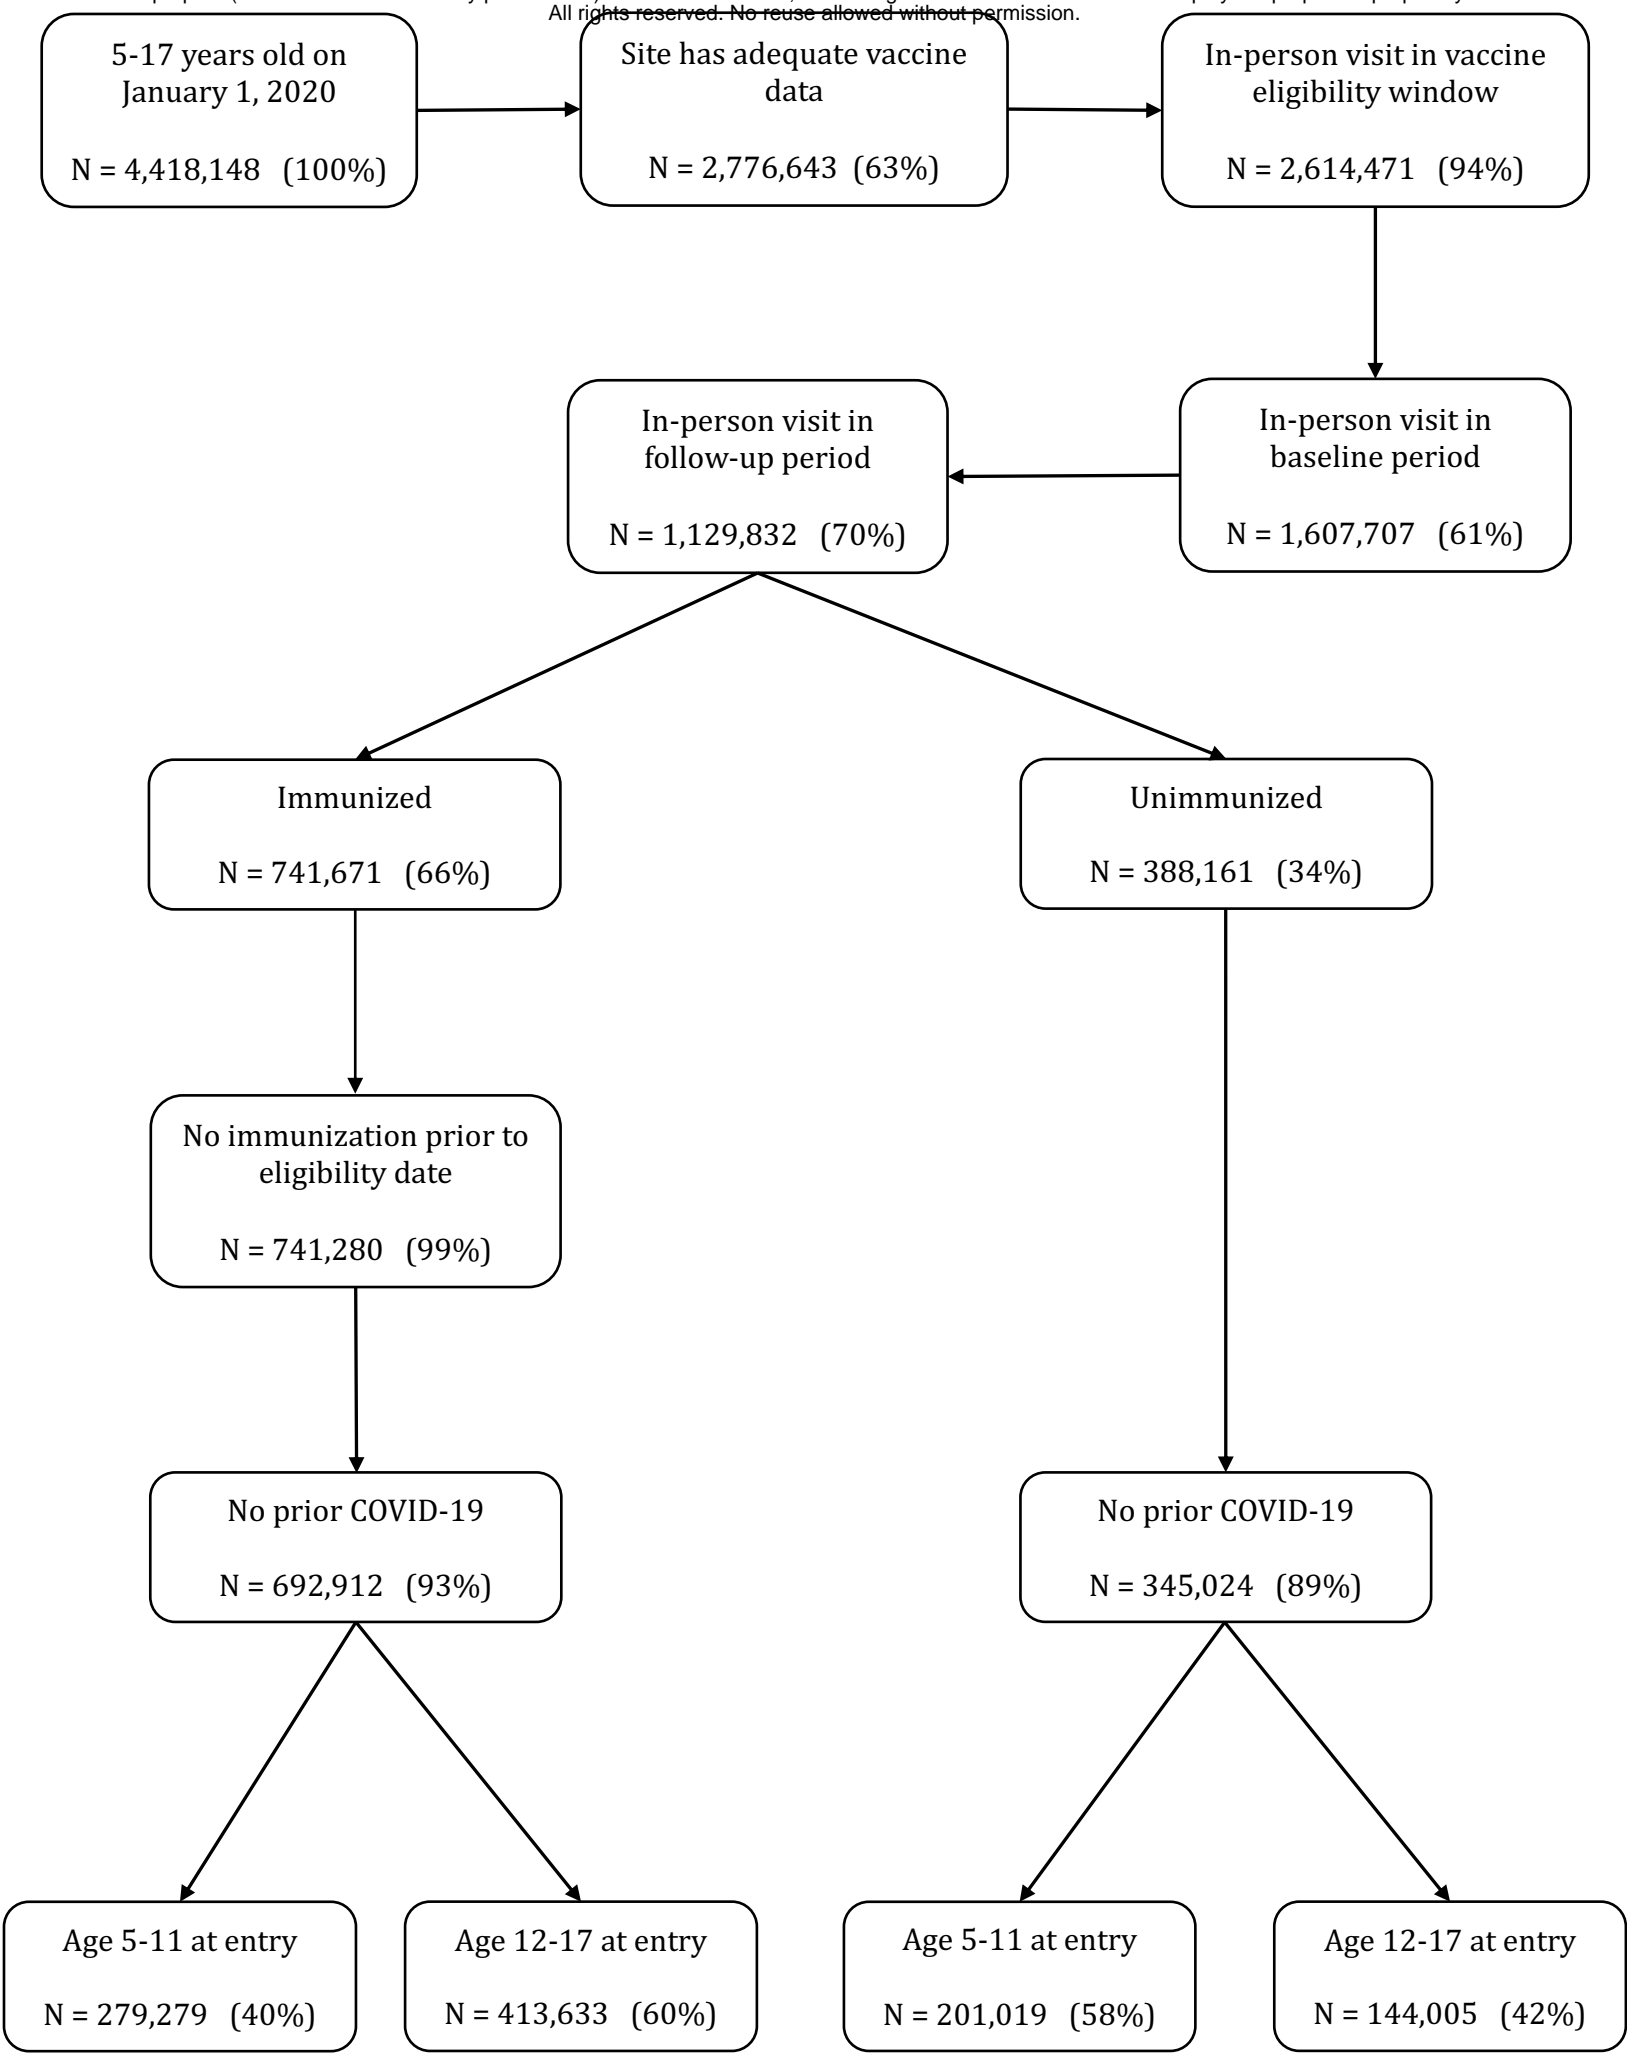

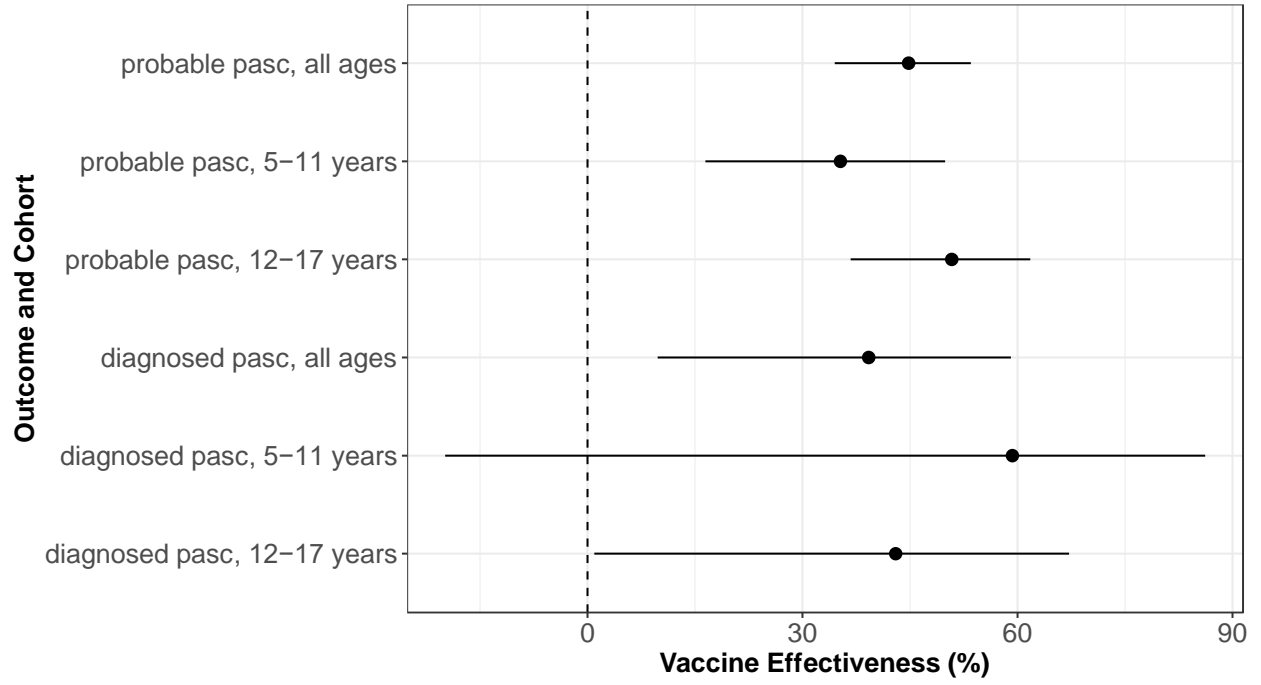

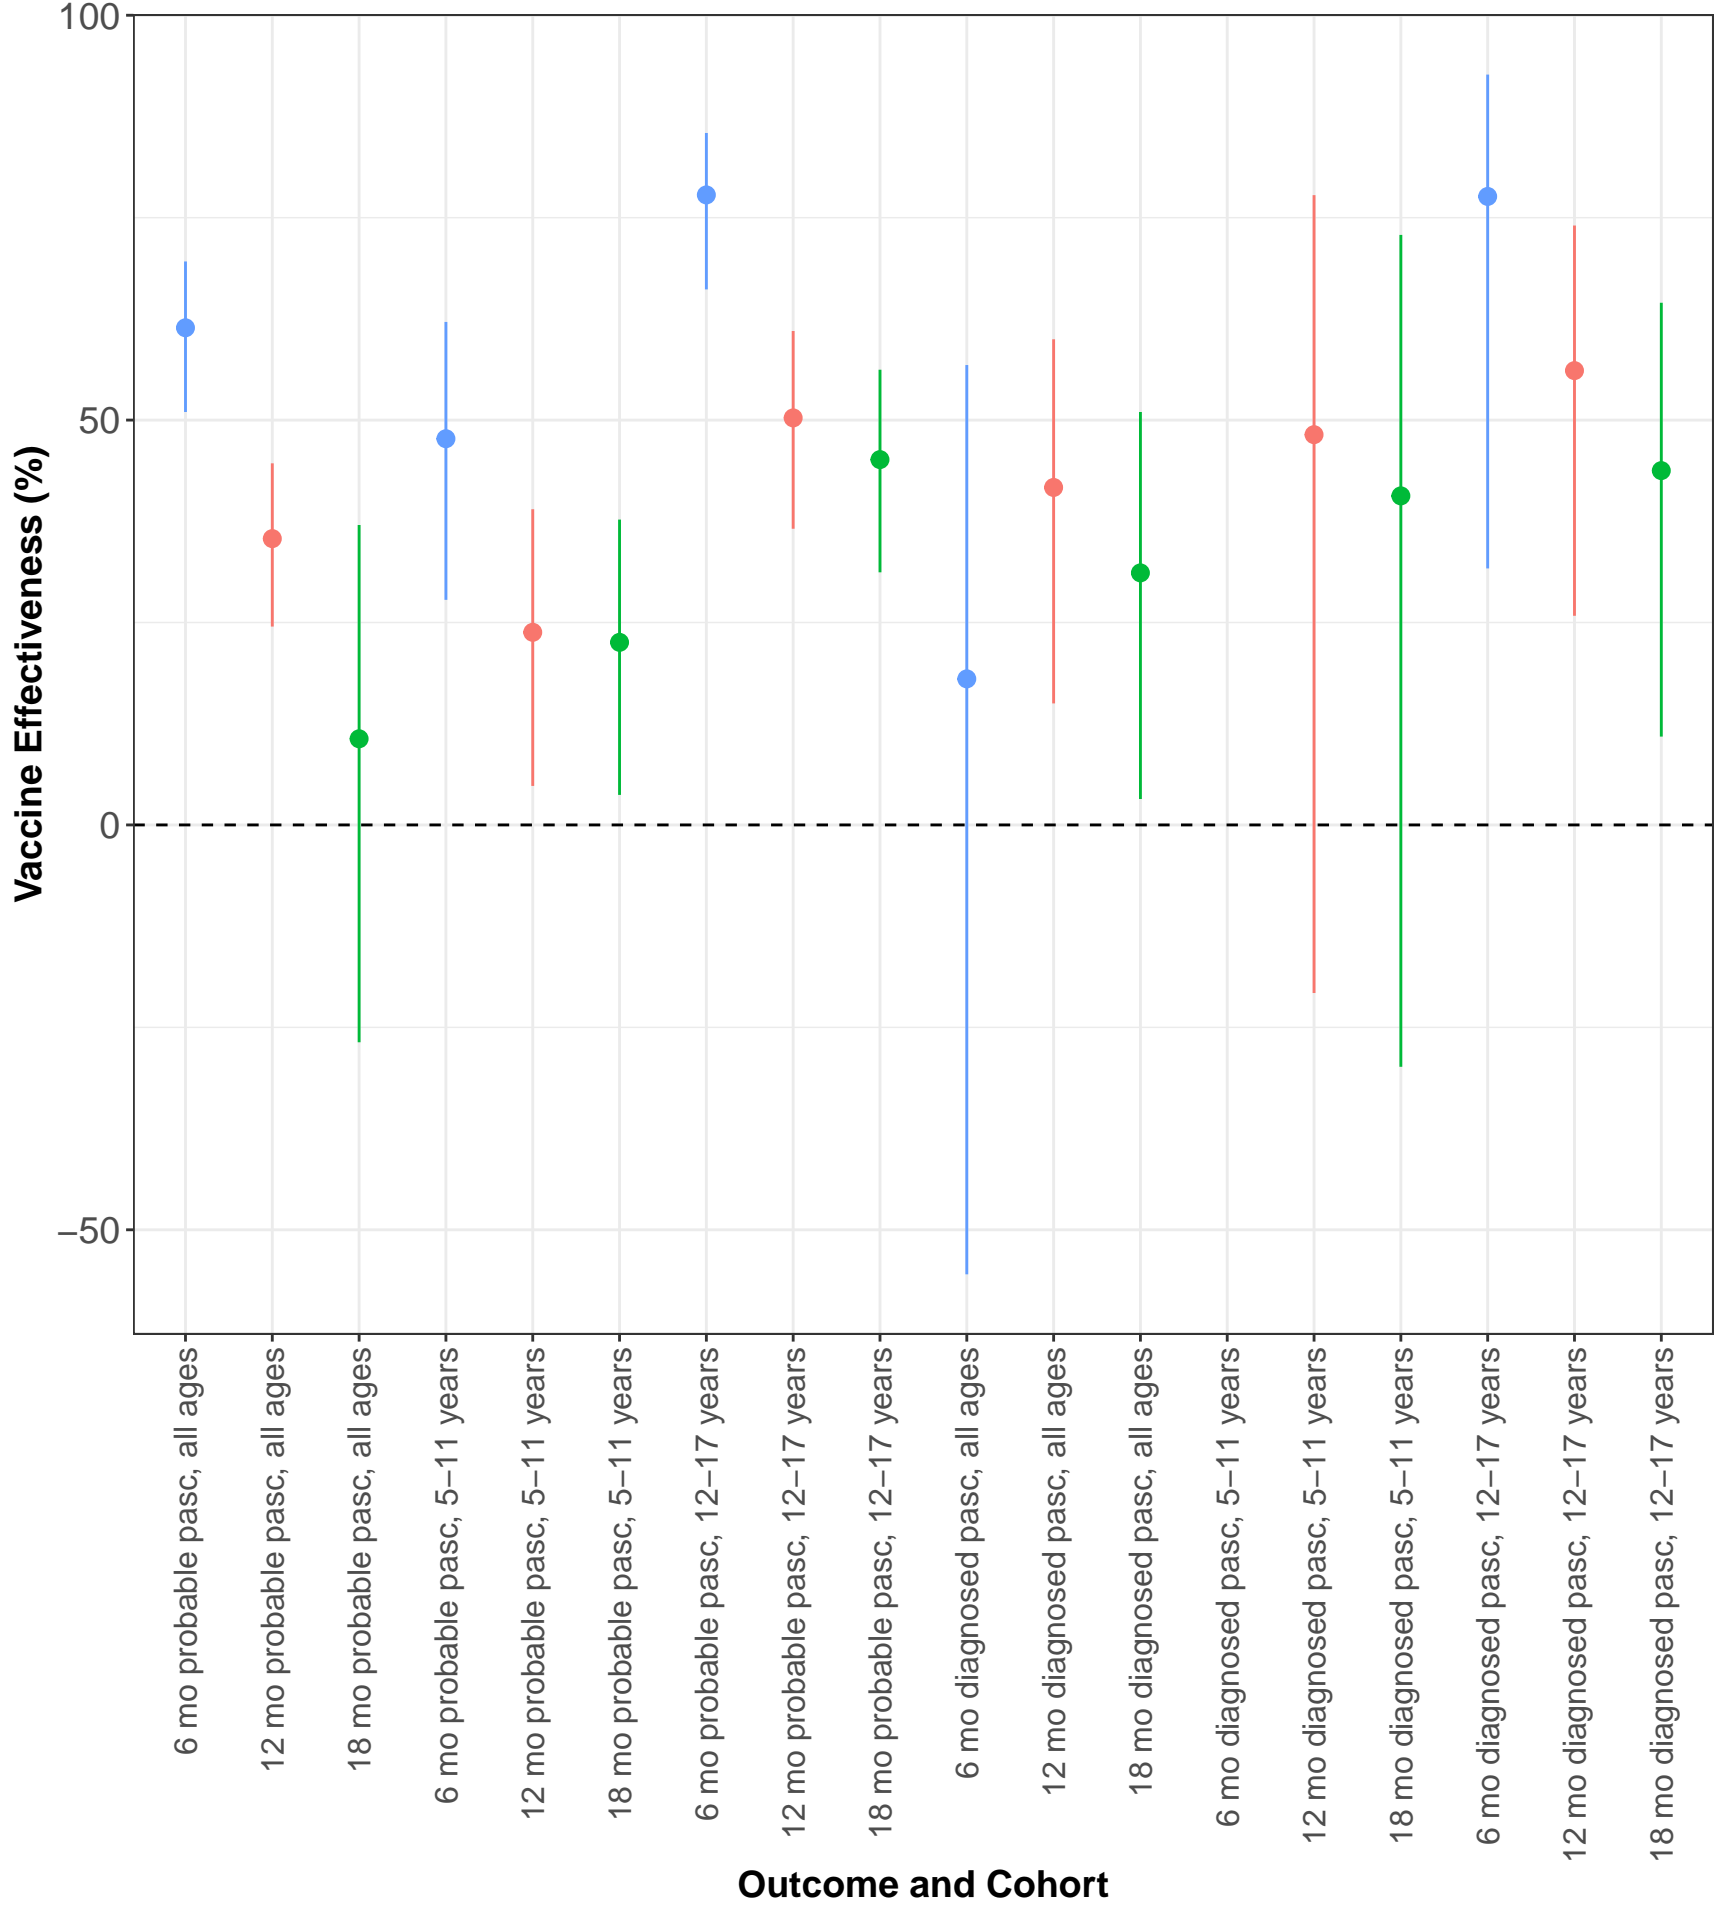

Source: https://medrxiv.org/content/medrxiv/early/2023/09/28/2023.09.27.23296100.full.pdf
